# Supplementary material
Source: Springer Nature journal article supplement (https://www.springerprofessional.de/resource/supplementary/13638_2011_303_MOESM4_ESM.pdf/11898162)
Supplement: MOESM4 [file 11898162]

|    |    |    |    |    |    |    |    |   |
|----|----|----|----|----|----|----|----|---|
|    | v1 | v2 | v3 | v4 | v5 | v6 |    |   |
| c1 | (  | 0  | -1 | 2  | -1 | -1 | 1  | → |
| c2 |    | -1 | 3  | -1 | -1 | 1  | 2  |   |
| c3 |    | -1 | -1 | 0  | 1  | 3  | -1 |   |
| c4 |    | 3  | 2  | -1 | 0  | -1 | -1 |   |

|   |   |   |   |
|---|---|---|---|
|   | 1 |   |   |
|   |   | 1 |   |
|   |   |   | 1 |
| 1 |   |   |   |

expansion factor = 4

permutation factor = 1
